# Supplementary material for: Conformational features of 4-(N)-squalenoyl-gemcitabine in solution: a combined NMR and molecular dynamics investigation
Source: Royal Society of Chemistry journal article supplement (doi:10.1039/c4nj02091j), 2015-01-01
Supplement: c4nj02091j1.pdf [file c4nj02091j1.pdf]

Electronic Supplementary Material (ESI) for New Journal of Chemistry. This journal is © The Royal Society of Chemistry and the Centre National de la Recherche Scientifique 2015

## Supporting Information for the manuscript

# Conformational Features of 4-(N)-Squalenoyl-Gemcitabine in solution: a combined NMR and Molecular Dynamics Investigation

Ceruti Maurizio<sup>\*a</sup>, Rocco Flavio<sup>a</sup>, Di Pietro Maria Enrica<sup>b</sup>, Tocci Elena<sup>c</sup>, De Luca Giuseppina<sup>\*b</sup>

<sup>a</sup> *Dipartimento di Scienza e Tecnologia*

*del Farmaco, Università degli Studi di Torino, Via P. Giuria 9, 10125 Torino, Italy*

<sup>b</sup> *Dipartimento di Chimica e Tecnologie Chimiche, Università degli Studi della Calabria, Via P. Bucci, cubo 14C, 87036 Rende (CS), Italy*

<sup>c</sup> *Institute on Membrane Technology (ITM-CNR), Via P. Bucci 17/C, 87036 Rende (CS), Italy*

\* *Corresponding authors E-mail: [maurizio.ceruti@unito.it](mailto:maurizio.ceruti@unito.it), [giuseppina.deluca@unical.it](mailto:giuseppina.deluca@unical.it)*

**Table I.** List of the 51 conformers obtained from the MD calculations, together with their relative energy (calculated as the difference in energy between the *i*-th conformer and the dominant conformer at 3.8 ns) and the corresponding relative existence probability. The threshold value of about 8 kJ/mol is indicated by a horizontal dividing line. Among the 27 conformers with energy lower than the threshold value, the 4 major conformations chosen for the discussion are in bold type.

| snapshot (ns) | relative energy (kcal/mol) | relative energy (kJ/mol) | relative probability (%) |
|---------------|----------------------------|--------------------------|--------------------------|
| <b>3,8</b>    | <b>0,0000</b>              | <b>0,0000</b>            | <b>20,2983</b>           |
| 5,4           | 0,5686                     | 2,3792                   | 7,8201                   |
| 1,3           | 0,6205                     | 2,5963                   | 7,1683                   |
| 2,1           | 0,6410                     | 2,6818                   | 6,9268                   |
| 4,9           | 0,7897                     | 3,3041                   | 5,3972                   |
| 5,7           | 0,8140                     | 3,4058                   | 5,1816                   |
| <b>3,6</b>    | <b>1,0800</b>              | <b>4,5188</b>            | <b>3,3166</b>            |
| 1,5           | 1,1314                     | 4,7339                   | 3,0426                   |
| 4,1           | 1,1467                     | 4,7978                   | 2,9656                   |
| 3,0           | 1,1596                     | 4,8518                   | 2,9020                   |
| 1,6           | 1,1602                     | 4,8541                   | 2,8993                   |
| 2,2           | 1,3035                     | 5,4539                   | 2,2797                   |
| 4,2           | 1,3557                     | 5,6724                   | 2,0885                   |
| 2,5           | 1,3920                     | 5,8242                   | 1,9651                   |
| 2,3           | 1,3933                     | 5,8297                   | 1,9608                   |
| 5,0           | 1,5068                     | 6,3045                   | 1,6210                   |
| <b>1,0</b>    | <b>1,5679</b>              | <b>6,5600</b>            | <b>1,4631</b>            |
| 5,8           | 1,6324                     | 6,8301                   | 1,3130                   |
| 4,6           | 1,6404                     | 6,8633                   | 1,2956                   |
| 3,5           | 1,6525                     | 6,9139                   | 1,2696                   |
| 1,8           | 1,7119                     | 7,1627                   | 1,1491                   |
| 5,5           | 1,7433                     | 7,2942                   | 1,0901                   |
| 3,3           | 1,7460                     | 7,3054                   | 1,0852                   |
| 2,7           | 1,7636                     | 7,3788                   | 1,0537                   |
| <b>2,9</b>    | <b>1,7782</b>              | <b>7,4400</b>            | <b>1,0282</b>            |
| 5,3           | 1,8170                     | 7,6024                   | 0,9634                   |
| 2,8           | 1,8953                     | 7,9301                   | 0,8448                   |
| 2,6           | 2,0130                     | 8,4225                   | 0,6934                   |
| 3,9           | 2,0238                     | 8,4675                   | 0,6810                   |
| 4,7           | 2,0339                     | 8,5098                   | 0,6696                   |
| 3,1           | 2,0780                     | 8,6943                   | 0,6218                   |
| 3,2           | 2,0780                     | 8,6943                   | 0,6218                   |
| 2,0           | 2,1377                     | 8,9440                   | 0,5626                   |
| 2,4           | 2,1383                     | 8,9466                   | 0,5620                   |
| 5,2           | 2,1531                     | 9,0087                   | 0,5482                   |

|     |        |         |        |
|-----|--------|---------|--------|
| 1,9 | 2,2359 | 9,3550  | 0,4771 |
| 3,7 | 2,2490 | 9,4099  | 0,4667 |
| 4,0 | 2,2704 | 9,4994  | 0,4503 |
| 3,4 | 2,3136 | 9,6802  | 0,4188 |
| 1,7 | 2,3196 | 9,7052  | 0,4146 |
| 5,9 | 2,3286 | 9,7428  | 0,4084 |
| 5,1 | 2,4518 | 10,2585 | 0,3321 |
| 5,6 | 2,4654 | 10,3153 | 0,3247 |
| 4,5 | 2,4777 | 10,3667 | 0,3181 |
| 4,8 | 2,4899 | 10,4178 | 0,3116 |
| 6,0 | 2,7171 | 11,3685 | 0,2128 |
| 1,1 | 2,7551 | 11,5272 | 0,1997 |
| 1,4 | 3,0005 | 12,5541 | 0,1323 |
| 4,3 | 3,1042 | 12,9878 | 0,1112 |
| 1,2 | 3,5024 | 14,6540 | 0,0570 |
| 4,4 | 4,3160 | 18,0581 | 0,0146 |

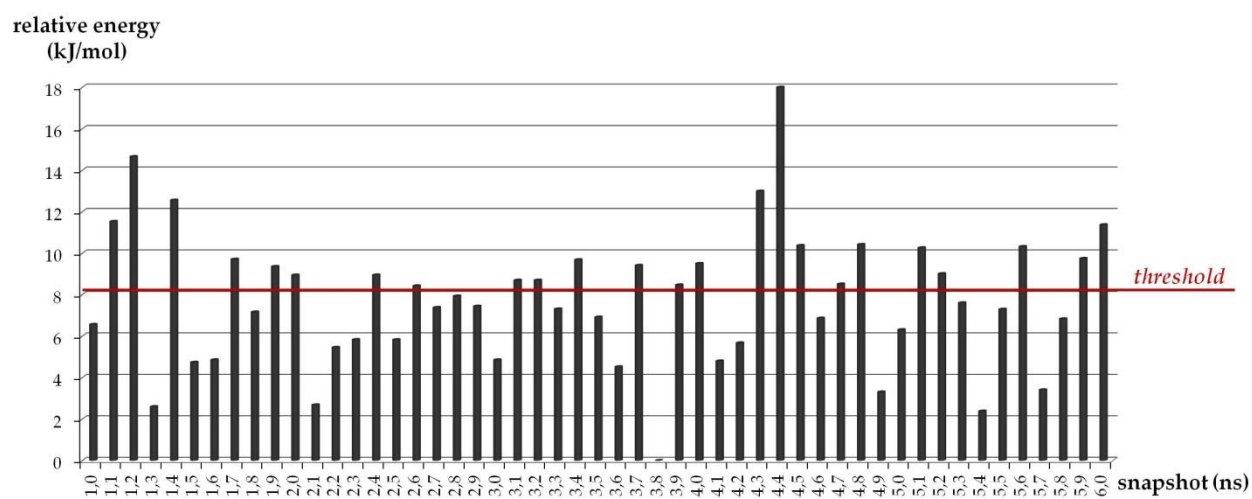

**Figure I.** Relative energy of the 51 conformers obtained from MD simulations calculated as the difference in energy between the  $i$ -th conformer and the dominant conformer at 3.8 ns. The red horizontal line indicates the value of the threshold of about 8 kJ/mol above which the conformers have been neglected.
